# Supplementary material for: Assessing Face Validity of the Hexcom Model for Capturing Complexity in the Clinical Practice: A Delphi Study
Source: Preprints.org preprint supplement (doi:10.20944/preprints202012.0724.v1), 2020-12-29
Supplement: Supplementary file 3 [file supplementary]

Archive with 2 entries (2 files):
- Supplementary materials HexCOM2.pdf
- Supplementary materials HexCom_1.pdf
