# Supplementary figures and images for: Assessing Face Validity of the Hexcom Model for Capturing Complexity in the Clinical Practice: A Delphi Study
Source: Preprints.org preprint supplement (doi:10.20944/preprints202012.0724.v1), 2020-12-29

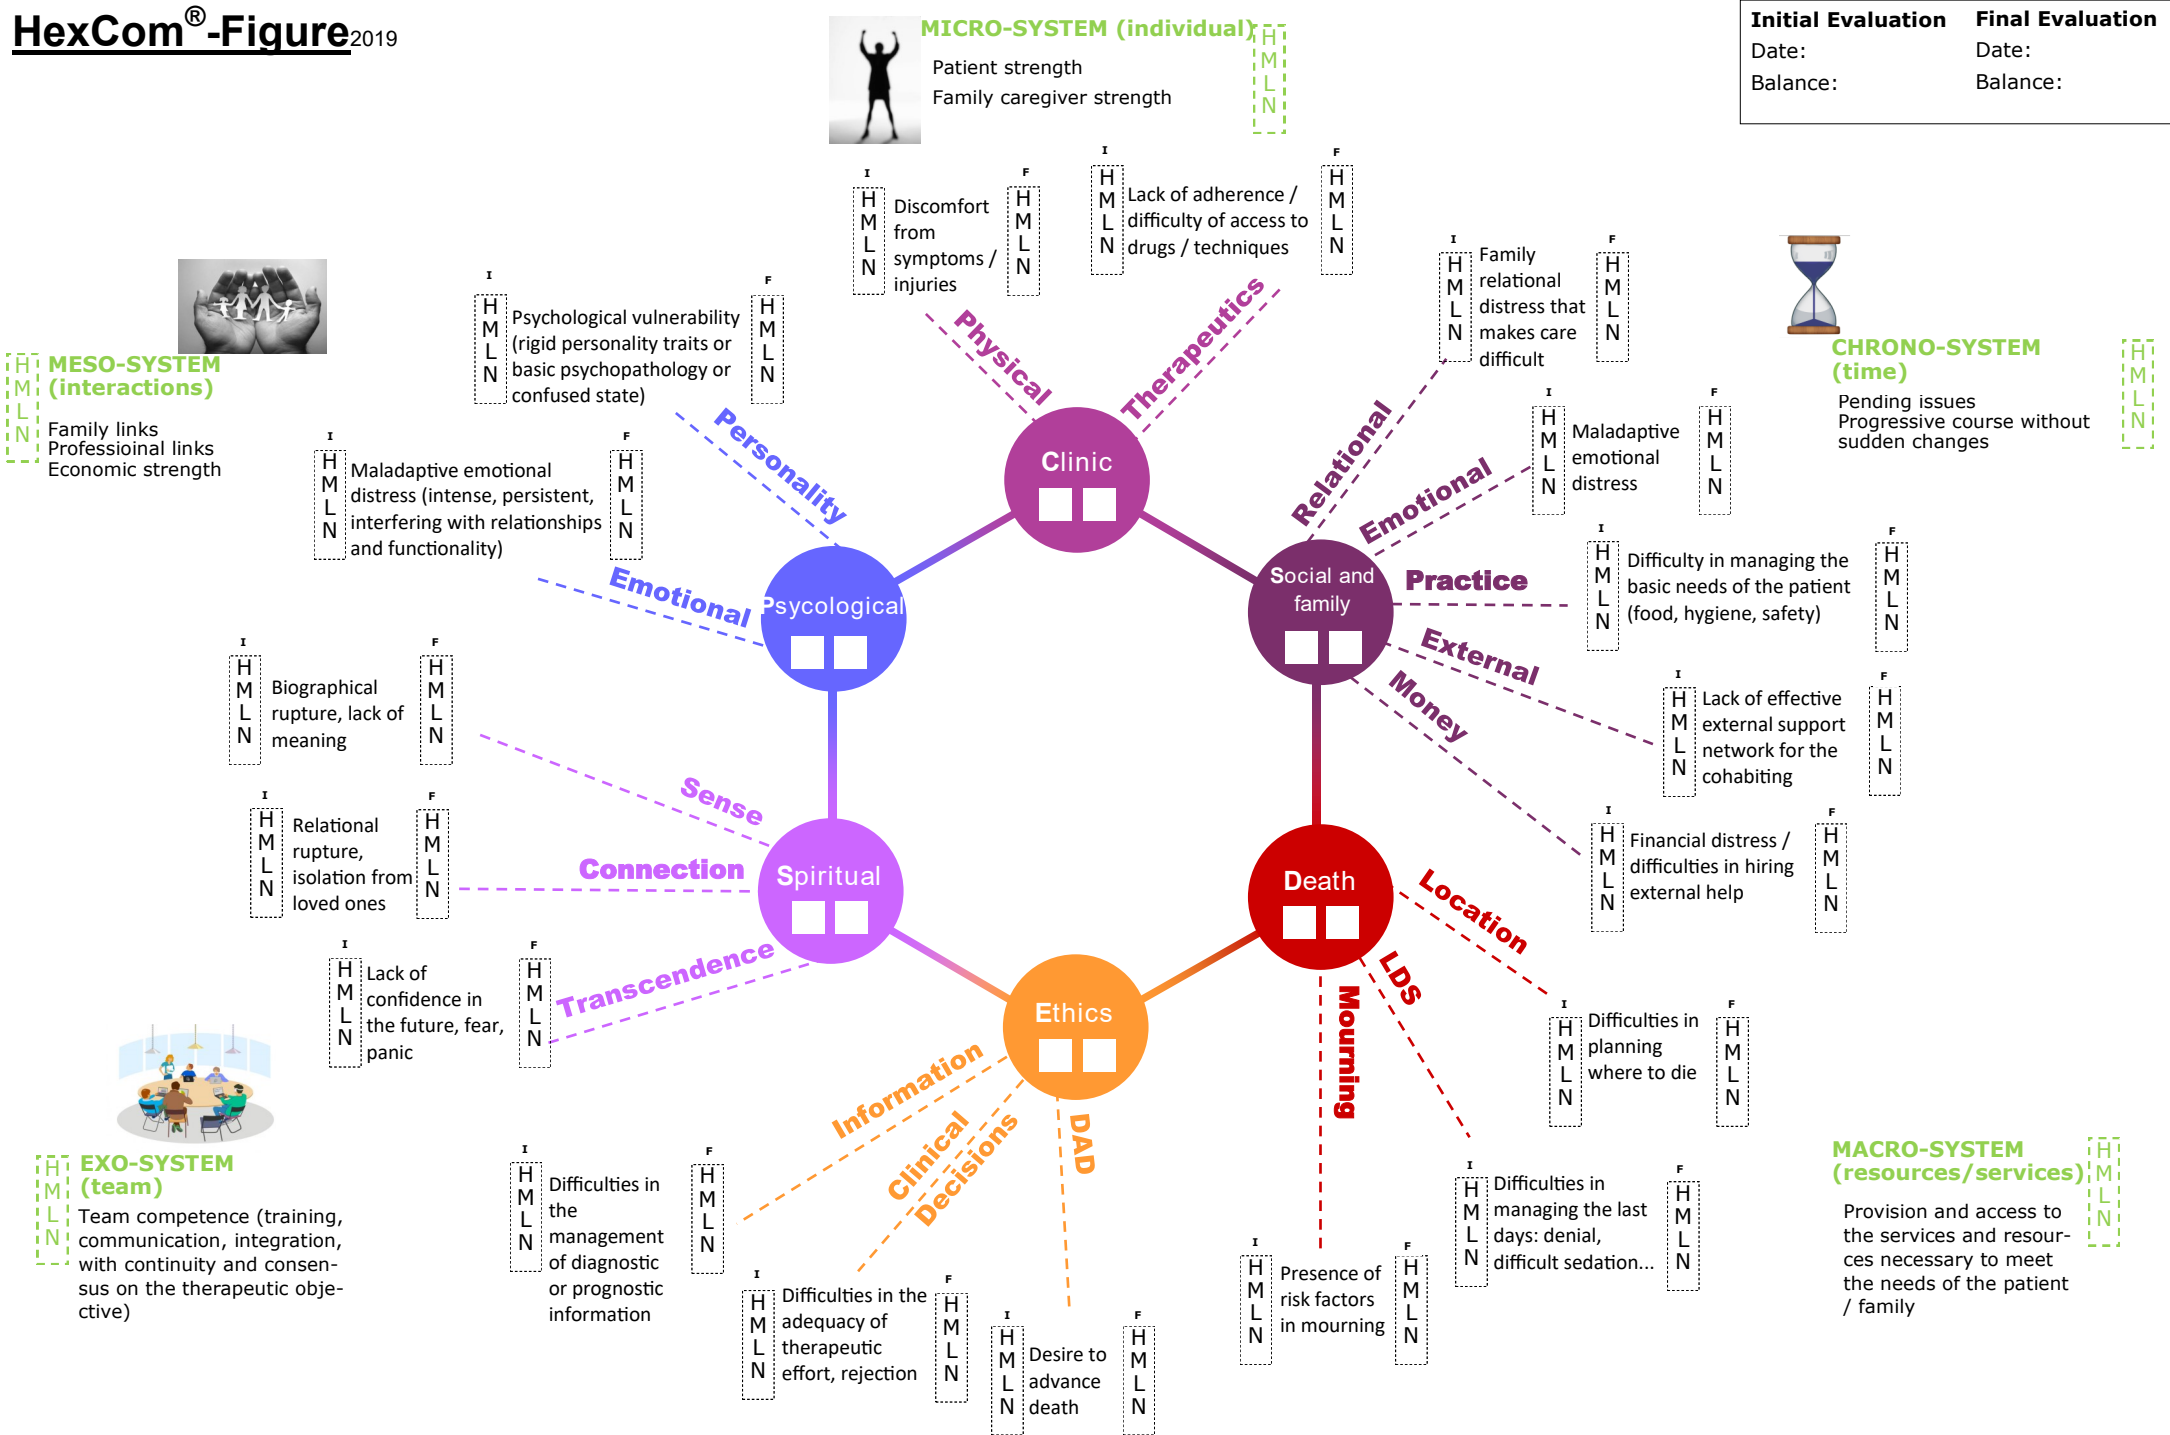

Supplement: Supplementary file 2 [file supplementary]
